# Supplementary material for: Diagnosis and treatment of digestive cancers during COVID-19 in Japan: A Cancer Registry-based Study on the Impact of COVID-19 on Cancer Care in Osaka (CanReCO)
Source: PubMed Central journal article supplement (PMC9488819; doi:10.1371/journal.pone.0274918), 2022-09-20
Supplement: pone.0274918.s004.pdf [file pone.0274918.s004.pdf]

**S1Table. Number of diagnoses and clinical stage 0 & I, percentage of clinical stage 0 & I and relative change by month for six digestive cancers, Osaka, Japan, 2019 and 2020.**

| Month of diagnosis | Stomach                                            |                   |                 |             | Colorectum                                         |                    |                 |             | Esophagus                                          |                   |                 |             |
|--------------------|----------------------------------------------------|-------------------|-----------------|-------------|----------------------------------------------------|--------------------|-----------------|-------------|----------------------------------------------------|-------------------|-----------------|-------------|
|                    | Number of stage 0 & I /<br>Number of diagnoses (%) |                   | Relative change |             | Number of stage 0 & I /<br>Number of diagnoses (%) |                    | Relative change |             | Number of stage 0 & I /<br>Number of diagnoses (%) |                   | Relative change |             |
|                    | Year of diagnosis                                  |                   | Total           | Stage 0 & I | Year of diagnosis                                  |                    | Total           | Stage 0 & I | Year of diagnosis                                  |                   | Total           | Stage 0 & I |
| 2019               | 2020                                               | 2019              |                 |             | 2020                                               | 2019               |                 |             | 2020                                               |                   |                 |             |
| January            | 379/691<br>(54.9)                                  | 364/622<br>(58.5) | -10.0%          | -4.0%       | 351/959<br>(36.6)                                  | 381/1012<br>(37.7) | +5.5%           | +8.5%       | 95/197<br>(48.2)                                   | 121/239<br>(50.6) | +21.3%          | +27.4%      |
| February           | 377/677<br>(55.7)                                  | 379/674<br>(56.2) | -0.4%           | +0.5%       | 390/1024<br>(38.1)                                 | 386/1003<br>(38.5) | -2.1%           | -1.0%       | 98/197<br>(49.8)                                   | 101/209<br>(48.3) | +6.1%           | +3.1%       |
| March              | 444/777<br>(57.1)                                  | 394/721<br>(54.7) | -7.2%           | -11.3%      | 359/1047<br>(34.3)                                 | 402/1098<br>(36.6) | +4.9%           | +12.0%      | 104/244<br>(42.6)                                  | 97/235<br>(41.3)  | -3.7%           | -6.7%       |
| April              | 441/791<br>(55.8)                                  | 274/531<br>(51.6) | -32.9%          | -37.9%      | 406/1145<br>(35.5)                                 | 358/993<br>(36.1)  | -13.3%          | -11.8%      | 101/229<br>(44.1)                                  | 91/193<br>(47.2)  | -15.7%          | -9.9%       |
| May                | 414/765<br>(54.1)                                  | 247/508<br>(48.6) | -33.6%          | -40.3%      | 358/1002<br>(35.7)                                 | 240/795<br>(30.2)  | -20.7%          | -33.0%      | 115/226<br>(50.9)                                  | 55/135<br>(40.7)  | -40.3%          | -52.2%      |
| June               | 447/784<br>(57.0)                                  | 366/708<br>(51.7) | -9.7%           | -18.1%      | 362/1050<br>(34.5)                                 | 323/1047<br>(30.9) | -0.3%           | -10.8%      | 109/272<br>(40.1)                                  | 96/203<br>(47.3)  | -25.4%          | -11.9%      |
| July               | 487/863<br>(56.4)                                  | 385/723<br>(53.3) | -16.2%          | -20.9%      | 476/1308<br>(36.4)                                 | 325/1063<br>(30.6) | -18.7%          | -31.7%      | 124/264<br>(47.0)                                  | 105/226<br>(46.5) | -14.4%          | -15.3%      |
| August             | 422/743<br>(56.8)                                  | 328/631<br>(52.0) | -15.1%          | -22.3%      | 406/1061<br>(38.3)                                 | 295/955<br>(30.9)  | -10.0%          | -27.3%      | 101/226<br>(44.7)                                  | 92/209<br>(44)    | -7.5%           | -8.9%       |
| September          | 382/714<br>(53.5)                                  | 364/668<br>(54.5) | -6.4%           | -4.7%       | 354/1082<br>(32.7)                                 | 344/1070<br>(32.2) | -1.1%           | -2.8%       | 121/222<br>(54.5)                                  | 96/221<br>(43.4)  | -0.5%           | -20.7%      |
| October            | 393/729<br>(53.9)                                  | 445/801<br>(55.6) | +9.9%           | +13.2%      | 393/1132<br>(34.7)                                 | 366/1172<br>(31.2) | +3.5%           | -6.9%       | 116/270<br>(43.0)                                  | 125/259<br>(48.3) | -4.1%           | +7.8%       |
| November           | 403/744<br>(54.2)                                  | 394/675<br>(58.4) | -9.3%           | -2.2%       | 393/1097<br>(35.8)                                 | 340/1029<br>(33.0) | -6.2%           | -13.5%      | 109/221<br>(49.3)                                  | 97/196<br>(49.5)  | -11.3%          | -11.0%      |
| December           | 441/764<br>(57.2)                                  | 358/632<br>(56.7) | -17.3%          | -18.8%      | 366/1078<br>(34.0)                                 | 342/1019<br>(33.6) | -5.5%           | -6.6%       | 122/267<br>(45.7)                                  | 103/214<br>(48.1) | -19.9%          | -15.6%      |

Clinical stage defined by the UICC (Union for International Cancer Control). The reference for the relative change in 2020 was 2019.

Continued from S1 Table.

| Month of diagnosis | Liver                                              |                   |                 |             | Gallbladder                                        |                  |                 |             | Pancreas                                           |                  |                 |             |
|--------------------|----------------------------------------------------|-------------------|-----------------|-------------|----------------------------------------------------|------------------|-----------------|-------------|----------------------------------------------------|------------------|-----------------|-------------|
|                    | Number of stage 0 & I /<br>Number of diagnoses (%) |                   | Relative change |             | Number of stage 0 & I /<br>Number of diagnoses (%) |                  | Relative change |             | Number of stage 0 & I /<br>Number of diagnoses (%) |                  | Relative change |             |
|                    | Year of diagnosis                                  |                   | Total           | Stage 0 & I | Year of diagnosis                                  |                  | Total           | Stage 0 & I | Year of diagnosis                                  |                  | Total           | Stage 0 & I |
|                    | 2019                                               | 2020              |                 |             | 2019                                               | 2020             |                 |             | 2019                                               | 2020             |                 |             |
| January            | 90/261<br>(34.5)                                   | 90/224<br>(40.2)  | -14.2%          | 0.0%        | 12/110<br>(10.9)                                   | 13/107<br>(12.2) | -2.7%           | +8.3%       | 67/249<br>(26.9)                                   | 73/254<br>(28.7) | +2.0%           | +9.0%       |
| February           | 89/221<br>(40.3)                                   | 105/239<br>(43.9) | 8.1%            | +18.0%      | 15/100<br>(15.0)                                   | 18/116<br>(15.5) | +16.0%          | 20.0%       | 64/239<br>(26.8)                                   | 72/248<br>(29.0) | +3.8%           | +12.5%      |
| March              | 105/268<br>(39.2)                                  | 98/251<br>(39.0)  | -6.3%           | -6.7%       | 20/127<br>(15.8)                                   | 9/140<br>(6.4)   | +10.2%          | -55.0%      | 54/252<br>(21.4)                                   | 63/265<br>(23.8) | +5.2%           | +16.7%      |
| April              | 118/288<br>(41.0)                                  | 90/227<br>(39.7)  | -21.2%          | -23.7%      | 11/129<br>(8.5)                                    | 10/113<br>(8.9)  | -12.4%          | -9.1%       | 54/282<br>(19.2)                                   | 71/282<br>(25.2) | 0.0%            | +31.5%      |
| May                | 102/268<br>(38.1)                                  | 77/184<br>(41.9)  | -31.3%          | -24.5%      | 17/116<br>(14.7)                                   | 17/93<br>(18.3)  | -19.8%          | 0.0%        | 67/266<br>(25.2)                                   | 62/244<br>(25.4) | -8.3%           | -7.5%       |
| June               | 94/247<br>(38.1)                                   | 111/245<br>(45.3) | -0.8%           | 18.1%       | 18/125<br>(14.4)                                   | 20/120<br>(16.7) | -4.0%           | +11.1%      | 69/263<br>(26.2)                                   | 61/270<br>(22.6) | +2.7%           | -11.6%      |
| July               | 118/296<br>(39.9)                                  | 120/273<br>(44.0) | -7.8%           | +1.7%       | 18/135<br>(13.3)                                   | 15/114<br>(13.2) | -15.6%          | -16.7%      | 92/308<br>(29.9)                                   | 69/272<br>(25.4) | -11.7%          | -25.0%      |
| August             | 98/274<br>(35.8)                                   | 86/211<br>(40.8)  | -23.0%          | -12.2%      | 9/123<br>(7.3)                                     | 14/113<br>(12.4) | -8.1%           | +55.6%      | 67/284<br>(23.6)                                   | 60/268<br>(22.4) | -5.6%           | -10.4%      |
| September          | 84/241<br>(34.9)                                   | 100/227<br>(44.1) | -5.8%           | +19.0%      | 15/109<br>(13.8)                                   | 13/94<br>(13.8)  | -13.8%          | -13.3%      | 53/271<br>(19.6)                                   | 69/254<br>(27.2) | -6.3%           | +30.2%      |
| October            | 102/243<br>(42.0)                                  | 111/276<br>(40.2) | 13.6%           | +8.8%       | 17/118<br>(14.4)                                   | 21/117<br>(18.0) | -0.8%           | +23.5%      | 84/290<br>(29.0)                                   | 78/288<br>(27.1) | -0.7%           | -7.1%       |
| November           | 94/233<br>(40.3)                                   | 75/203<br>(37.0)  | -12.9%          | -20.2%      | 11/122<br>(9.0)                                    | 11/99<br>(11.1)  | -18.9%          | 0.0%        | 76/271<br>(28.0)                                   | 70/258<br>(27.1) | -4.8%           | -7.9%       |
| December           | 99/244<br>(40.6)                                   | 85/221<br>(38.5)  | -9.4%           | -14.1%      | 15/121<br>(12.4)                                   | 14/97<br>(14.4)  | -19.8%          | -6.7%       | 59/274<br>(21.5)                                   | 77/283<br>(27.2) | +3.3%           | +30.5%      |

Clinical stage defined by the UICC (Union for International Cancer Control). The reference for the relative change in 2020 was 2019.
