# Supplementary material for: Diagnosis and treatment of digestive cancers during COVID-19 in Japan: A Cancer Registry-based Study on the Impact of COVID-19 on Cancer Care in Osaka (CanReCO)
Source: PubMed Central journal article supplement (PMC9488819; doi:10.1371/journal.pone.0274918), 2022-09-20
Supplement: pone.0274918.s005.pdf [file pone.0274918.s005.pdf]

**S2 Table. Median time from diagnosis to first treatment for six digestive cancers in the CanReCO project, Osaka, Japan, 2019 and 2020.**

| Cancer site | Median time to treatment in days (IQR) |               | Relative change* | p-value# |
|-------------|----------------------------------------|---------------|------------------|----------|
|             | Year of diagnosis                      |               |                  |          |
|             | 2019                                   | 2020          |                  |          |
| Stomach     | 30 (18 to 47)                          | 28 (16 to 43) | -6.7%            | p<0.001  |
| Colorectum  | 19 (0 to 33)                           | 15 (0 to 29)  | -21.1%           | p<0.001  |
| Esophagus   | 28 (17 to 46)                          | 25 (14 to 42) | -10.7%           | p<0.001  |
| Liver       | 30 (18 to 48)                          | 29 (17 to 43) | -3.3%            | 0.022    |
| Gallbladder | 29 (12 to 46)                          | 25 (12 to 42) | -13.8%           | 0.059    |
| Pancreas    | 20 (11 to 35)                          | 18 (10 to 29) | -10.0%           | 0.001    |

Abbreviations: IQR, interquartile range. \* Relative change of the point estimates in median time to treatment. # p-value of the Wilcoxon rank sum test.
