# Supplementary material for: Diagnosis and treatment of digestive cancers during COVID-19 in Japan: A Cancer Registry-based Study on the Impact of COVID-19 on Cancer Care in Osaka (CanReCO)
Source: PubMed Central journal article supplement (PMC9488819; doi:10.1371/journal.pone.0274918), 2022-09-20
Supplement: pone.0274918.s006.pdf [file pone.0274918.s006.pdf]

**S3 Table. Number of operations and median time to operation by month for six digestive cancers in the CanReCO project, Osaka, Japan, 2019 and 2020.**

| Calendar month    | Number of operations |      |                 | Median time to operation (days) |      |                 |
|-------------------|----------------------|------|-----------------|---------------------------------|------|-----------------|
|                   | Year of diagnosis    |      | Relative change | Year of diagnosis               |      | Relative change |
|                   | 2019                 | 2020 |                 | 2019                            | 2020 |                 |
| <b>Stomach</b>    |                      |      |                 |                                 |      |                 |
| January           | 247                  | 238  | -3.6%           | 34                              | 32   | -5.9%           |
| February          | 242                  | 248  | +2.5%           | 34                              | 34   | 0.0%            |
| March             | 280                  | 278  | -0.7%           | 34                              | 31   | -10.3%          |
| April             | 271                  | 185  | -31.7%          | 41                              | 29   | -29.3%          |
| May               | 278                  | 168  | -39.6%          | 29                              | 20   | -31.0%          |
| June              | 296                  | 212  | -28.4%          | 31                              | 28   | -9.7%           |
| July              | 318                  | 263  | -17.3%          | 34                              | 30   | -11.8%          |
| August            | 261                  | 234  | -10.3%          | 36                              | 28   | -22.2%          |
| September         | 261                  | 205  | -21.5%          | 34                              | 27   | -20.6%          |
| October           | 247                  | 284  | +15.0%          | 34                              | 30   | -11.8%          |
| November          | 255                  | 209  | -18.0%          | 35                              | 27   | -22.9%          |
| December          | 259                  | 239  | -7.7%           | 38                              | 33   | -13.2%          |
| <b>Colorectum</b> |                      |      |                 |                                 |      |                 |
| January           | 478                  | 498  | +4.2%           | 26                              | 27   | +3.8%           |
| February          | 502                  | 504  | +0.4%           | 26                              | 25   | -3.8%           |
| March             | 527                  | 532  | +0.9%           | 26                              | 24   | -9.6%           |
| April             | 627                  | 458  | -27.0%          | 28                              | 23   | -17.9%          |
| May               | 495                  | 408  | -17.6%          | 25                              | 19   | -24.0%          |
| June              | 543                  | 539  | -0.7%           | 24                              | 18   | -25.0%          |
| July              | 661                  | 564  | -14.7%          | 27                              | 23   | -14.8%          |
| August            | 551                  | 522  | -5.3%           | 27                              | 21   | -22.2%          |
| September         | 560                  | 513  | -8.4%           | 27                              | 20   | -25.9%          |
| October           | 602                  | 618  | +2.7%           | 26                              | 24   | -7.7%           |
| November          | 560                  | 556  | -0.7%           | 27                              | 25   | -7.4%           |
| December          | 536                  | 497  | -7.3%           | 29                              | 25   | -13.8%          |
| <b>Esophagus</b>  |                      |      |                 |                                 |      |                 |
| January           | 39                   | 56   | +43.6%          | 73                              | 67   | -8.9%           |
| February          | 37                   | 48   | +29.7%          | 63                              | 76   | +19.8%          |
| March             | 49                   | 48   | -2.0%           | 74                              | 75   | +1.4%           |
| April             | 38                   | 39   | +2.6%           | 75                              | 66   | -12.0%          |
| May               | 43                   | 28   | -34.9%          | 68                              | 57   | -16.2%          |
| June              | 56                   | 43   | -23.2%          | 76                              | 62   | -17.9%          |
| July              | 50                   | 52   | +4.0%           | 64                              | 73   | +13.3%          |
| August            | 52                   | 44   | -15.4%          | 66                              | 60   | -9.1%           |
| September         | 45                   | 62   | +37.8%          | 74                              | 64   | -14.2%          |
| October           | 50                   | 63   | +26.0%          | 63                              | 73   | +16.8%          |
| November          | 53                   | 50   | -5.7%           | 80                              | 76   | -5.6%           |
| December          | 43                   | 46   | +7.0%           | 80                              | 72   | -10.0%          |

Number of operations excludes records with no information on date of operation. Number of days in time to treatment was rounded up to integer. Relative change for time to treatment was calculated with the crude number of days before rounding up the numbers.

Continued from **S3 Table**.

| Calendar month     | Number of operations |      |                 | Median time to operation (days) |      |                 |
|--------------------|----------------------|------|-----------------|---------------------------------|------|-----------------|
|                    | Year of diagnosis    |      | Relative change | Year of diagnosis               |      | Relative change |
|                    | 2019                 | 2020 |                 | 2019                            | 2020 |                 |
| <b>Liver</b>       |                      |      |                 |                                 |      |                 |
| January            | 57                   | 51   | -10.5%          | 40                              | 39   | -2.5%           |
| February           | 52                   | 62   | +19.2%          | 39                              | 40   | +2.6%           |
| March              | 66                   | 47   | -28.8%          | 36                              | 36   | +1.4%           |
| April              | 71                   | 56   | -21.1%          | 37                              | 34   | -9.5%           |
| May                | 65                   | 50   | -23.1%          | 38                              | 31   | -19.7%          |
| June               | 64                   | 68   | +6.3%           | 44                              | 30   | -31.0%          |
| July               | 83                   | 71   | -14.5%          | 37                              | 39   | +5.4%           |
| August             | 60                   | 53   | -11.7%          | 46                              | 32   | -29.7%          |
| September          | 50                   | 65   | +30.0%          | 43                              | 38   | -11.6%          |
| October            | 73                   | 80   | +9.6%           | 37                              | 36   | -4.1%           |
| November           | 60                   | 53   | -11.7%          | 45                              | 40   | -10.1%          |
| December           | 63                   | 68   | +7.9%           | 44                              | 41   | -6.8%           |
| <b>Gallbladder</b> |                      |      |                 |                                 |      |                 |
| January            | 45                   | 43   | -4.4%           | 31                              | 26   | -16.1%          |
| February           | 38                   | 48   | +26.3%          | 27                              | 33   | 20.4%           |
| March              | 49                   | 51   | +4.1%           | 35                              | 27   | -22.9%          |
| April              | 46                   | 41   | -10.9%          | 39                              | 25   | -35.1%          |
| May                | 49                   | 40   | -18.4%          | 27                              | 27   | 0.0%            |
| June               | 50                   | 48   | -4.0%           | 31                              | 30   | -1.6%           |
| July               | 51                   | 41   | -19.6%          | 34                              | 27   | -20.6%          |
| August             | 44                   | 34   | -22.7%          | 30                              | 29   | -1.7%           |
| September          | 39                   | 34   | -12.8%          | 28                              | 21   | -25.0%          |
| October            | 51                   | 42   | -17.6%          | 29                              | 27   | -6.9%           |
| November           | 46                   | 41   | -10.9%          | 30                              | 22   | -26.7%          |
| December           | 47                   | 36   | -23.4%          | 35                              | 34   | -2.9%           |
| <b>Pancreas</b>    |                      |      |                 |                                 |      |                 |
| January            | 71                   | 72   | +1.4%           | 35                              | 61   | +72.9%          |
| February           | 73                   | 66   | -9.6%           | 35                              | 46   | +31.4%          |
| March              | 53                   | 64   | +20.8%          | 33                              | 42   | +27.3%          |
| April              | 57                   | 73   | +28.1%          | 41                              | 49   | +19.5%          |
| May                | 64                   | 59   | -7.8%           | 36                              | 42   | +18.3%          |
| June               | 75                   | 57   | -24.0%          | 40                              | 68   | +70.0%          |
| July               | 86                   | 61   | -29.1%          | 43                              | 65   | +51.2%          |
| August             | 65                   | 71   | +9.2%           | 50                              | 62   | +24.0%          |
| September          | 68                   | 70   | +2.9%           | 50                              | 51   | +2.0%           |
| October            | 75                   | 64   | -14.7%          | 47                              | 45   | -5.3%           |
| November           | 57                   | 71   | +24.6%          | 54                              | 70   | +29.6%          |
| December           | 62                   | 70   | +12.9%          | 53                              | 63   | +18.9%          |

Number of days in time to treatment was rounded up to integer. Relative change for time to treatment was calculated with the crude number of days before rounding up the numbers.
