# Supplementary material for: Diagnosis and treatment of digestive cancers during COVID-19 in Japan: A Cancer Registry-based Study on the Impact of COVID-19 on Cancer Care in Osaka (CanReCO)
Source: PubMed Central journal article supplement (PMC9488819; doi:10.1371/journal.pone.0274918), 2022-09-20
Supplement: pone.0274918.s007.pdf [file pone.0274918.s007.pdf]

**S4 Table. Number of endoscopic surgeries and median time to endoscopic surgery by month for three digestive cancers in the CanReCO project, Osaka, Japan, 2019 and 2020.**

| Calendar month    | Number of endoscopic surgeries |      |                 | Median time to endoscopic surgery (days) |      |                 |
|-------------------|--------------------------------|------|-----------------|------------------------------------------|------|-----------------|
|                   | Year of diagnosis              |      | Relative change | Year of diagnosis                        |      | Relative change |
|                   | 2019                           | 2020 |                 | 2019                                     | 2020 |                 |
| <b>Stomach</b>    |                                |      |                 |                                          |      |                 |
| January           | 242                            | 229  | -5.4%           | 31                                       | 33   | +8.2%           |
| February          | 252                            | 241  | -4.4%           | 32                                       | 32   | +1.6%           |
| March             | 292                            | 260  | -11.0%          | 35                                       | 30   | -14.3%          |
| April             | 296                            | 184  | -37.8%          | 41                                       | 37   | -9.8%           |
| May               | 274                            | 171  | -37.6%          | 34                                       | 28   | -17.6%          |
| June              | 298                            | 251  | -15.8%          | 35                                       | 28   | -18.8%          |
| July              | 323                            | 269  | -16.7%          | 35                                       | 33   | -5.7%           |
| August            | 275                            | 240  | -12.7%          | 32                                       | 30   | -6.3%           |
| September         | 265                            | 267  | +0.8%           | 36                                       | 32   | -11.1%          |
| October           | 263                            | 307  | +16.7%          | 34                                       | 34   | 0.0%            |
| November          | 282                            | 268  | -5.0%           | 30                                       | 32   | +6.7%           |
| December          | 302                            | 234  | -22.5%          | 42                                       | 37   | -13.1%          |
| <b>Colorectum</b> |                                |      |                 |                                          |      |                 |
| January           | 293                            | 363  | +23.9%          | 0                                        | 0    | 0.0%            |
| February          | 333                            | 339  | +1.8%           | 0                                        | 0    | 0.0%            |
| March             | 326                            | 375  | +15.0%          | 0                                        | 0    | 0.0%            |
| April             | 324                            | 341  | +5.2%           | 0                                        | 0    | 0.0%            |
| May               | 301                            | 208  | -30.9%          | 0                                        | 0    | 0.0%            |
| June              | 327                            | 302  | -7.6%           | 0                                        | 0    | 0.0%            |
| July              | 403                            | 289  | -28.3%          | 0                                        | 0    | 0.0%            |
| August            | 326                            | 257  | -21.2%          | 0                                        | 0    | 0.0%            |
| September         | 324                            | 330  | +1.9%           | 0                                        | 0    | 0.0%            |
| October           | 339                            | 324  | -4.4%           | 0                                        | 0    | 0.0%            |
| November          | 338                            | 299  | -11.5%          | 0                                        | 0    | 0.0%            |
| December          | 348                            | 336  | -3.4%           | 0                                        | 0    | 0.0%            |
| <b>Esophagus</b>  |                                |      |                 |                                          |      |                 |
| January           | 73                             | 78   | +6.8%           | 34                                       | 42   | +22.1%          |
| February          | 74                             | 84   | +13.5%          | 40                                       | 37   | -6.3%           |
| March             | 74                             | 70   | -5.4%           | 32                                       | 36   | +12.5%          |
| April             | 70                             | 63   | -10.0%          | 48                                       | 37   | -22.9%          |
| May               | 77                             | 40   | -48.1%          | 41                                       | 30   | -26.8%          |
| June              | 80                             | 63   | -21.3%          | 39                                       | 36   | -6.5%           |
| July              | 84                             | 73   | -13.1%          | 35                                       | 30   | -13.0%          |
| August            | 70                             | 65   | -7.1%           | 41                                       | 34   | -16.0%          |
| September         | 83                             | 60   | -27.7%          | 36                                       | 32   | -12.5%          |
| October           | 80                             | 94   | +17.5%          | 40                                       | 39   | -2.5%           |
| November          | 70                             | 62   | -11.4%          | 42                                       | 40   | -4.8%           |
| December          | 88                             | 79   | -10.2%          | 41                                       | 36   | -12.2%          |

Number of endoscopic surgeries excludes records with no information on date of endoscopic surgery. Number of days in time to treatment was rounded up to integer. Relative change for time to treatment was calculated with the crude number of days before rounding up the numbers.
