# Supplementary material for: Diagnosis and treatment of digestive cancers during COVID-19 in Japan: A Cancer Registry-based Study on the Impact of COVID-19 on Cancer Care in Osaka (CanReCO)
Source: PubMed Central journal article supplement (PMC9488819; doi:10.1371/journal.pone.0274918), 2022-09-20
Supplement: pone.0274918.s008.pdf [file pone.0274918.s008.pdf]

**S5 Table. Number of screen-detected cases by age group for stomach and colorectal cancer in the CanReCO project, Osaka, Japan, 2019 and 2020.**

| Age group | Stomach                                                 |                    |                 |                     | Colorectum                                             |                    |                 |                     |
|-----------|---------------------------------------------------------|--------------------|-----------------|---------------------|--------------------------------------------------------|--------------------|-----------------|---------------------|
|           | Number of screen-detected /<br>Number of diagnoses* (%) |                    | Relative change |                     | Number of screen-detected /<br>Number of diagnoses (%) |                    | Relative change |                     |
|           | Year of diagnosis                                       |                    | Total*          | Screen-<br>detected | Year of diagnosis                                      |                    | Total*          | Screen-<br>detected |
|           | 2019                                                    | 2020               |                 |                     | 2019                                                   | 2020               |                 |                     |
| 0–39      | 15/61<br>(24.6)                                         | 13/48<br>(27.1)    | -21.3%          | -13.3%              | 36/158<br>(22.8)                                       | 24/141<br>(17.0)   | -10.8%          | -33.3%              |
| 40–49     | 59/208<br>(28.4)                                        | 43/175<br>(24.6)   | -15.9%          | -27.1%              | 180/561<br>(32.1)                                      | 162/519<br>(31.2)  | -7.5%           | -10.0%              |
| 50–64     | 365/1224<br>(29.8)                                      | 239/981<br>(24.4)  | -19.9%          | -34.5%              | 635/2415<br>(26.3)                                     | 631/2326<br>(27.1) | -3.7%           | -0.6%               |
| 65–74     | 509/2978<br>(17.1)                                      | 398/2518<br>(15.8) | -15.4%          | -21.8%              | 901/4204<br>(21.4)                                     | 676/3700<br>(18.3) | -12.0%          | -25.0%              |
| 75–84     | 224/3268<br>(6.9)                                       | 179/2895<br>(6.2)  | -11.4%          | -20.1%              | 482/3765<br>(12.8)                                     | 426/3691<br>(11.5) | -2.0%           | -11.6%              |
| 85–       | 34/921<br>(3.7)                                         | 34/938<br>(3.6)    | +1.8%           | 0.0%                | 65/1140<br>(5.7)                                       | 97/1211<br>(8.0)   | +6.2%           | +49.2%              |

The reference for the relative change in 2020 was 2019. \* The total number of diagnoses excludes records with unknown routes to diagnosis. The age grouping in S5 Table followed the cut-off age for screening ( $\geq 50$  years old for stomach cancer and  $\geq 40$  years old for colorectal cancer). Thus, the figures for the relative change in total are different from those (relative change by age group) in Table 1.
